# Supplementary material
Source: ML conference proceedings conference paper supplement (https://openaccess.thecvf.com/content/CVPR2024/html/Liu_Volumetric_Environment_Representation_CVPR_2024_paper.html)
Supplement: Supplementary file 1 [file Liu_Volumetric_Environment_Representation_CVPR_2024_supplemental.pdf]

# Volumetric Environment Representation for Vision-Language Navigation Supplementary Material

Rui Liu Wenguan Wang Yi Yang\*

ReLER, CCAI, Zhejiang University

<https://github.com/DefaultRui/VLN-VER>

This document provides more details of our approach and additional experimental results, which are organized as follows:

- Additional details (§A)
- Model details (§B)
- Discussion (§C)

## A. Additional details

**List of Symbols.** The below table will be definitely added into our supplementary material. We will omit unnecessary subscripts for notational convenience.

| Notation        | Description                          | Index                 |
|-----------------|--------------------------------------|-----------------------|
| $N$             | Number of candidates                 | §3.3                  |
| $\mathcal{X}$   | Volume state space                   | §3.2                  |
| $\mathcal{G}$   | Episodic memory graph                | §3.3                  |
| $\mathcal{V}$   | Observed viewpoints                  | §3.3                  |
| $\mathcal{E}$   | Navigable connections                | §3.3                  |
| $\mathcal{A}$   | Local action space                   | §3.3                  |
| $\mathcal{A}^*$ | Global action space                  | §3.3                  |
| $E$             | Instruction embeddings               | §3.2&3.3; Eq. (5)&(8) |
| $Q$             | 3D volume query                      | §3.1; Eq. (1)         |
| $F^{2d}$        | 2D perspective feature               | §3.1; Eq. (1)         |
| $F^{3d}$        | 3D volumetric representation         | §3.1; Eq. (1)&(2)     |
| $F^g$           | Height-aware group representation    | §3.2; Eq. (5)         |
| $F^p$           | Neighboring pillar representation    | §3.3; Eq. (7)         |
| $G$             | Node embeddings of $\mathcal{G}$     | §3.3; Eq. (8)         |
| $p^{3d}$        | Local state transition probabilities | §3.3; Eq. (4)         |
| $p^{2d}$        | Local action probabilities           | §3.3; Eq. (6)         |
| $p^g$           | Global action probabilities          | §3.3; Eq. (8)&(9)     |

† Subscript  $t$  in the paper denotes the navigation step.

**Multi-resolution Labels.** In coarse-to-fine VER representation extraction (§3.1), multi-resolution labels are utilized to supervise the perception network at each scale. The size of multi-resolution occupancy voxels are 0.4m, 0.2m, and 0.1m, respectively. The layout estimation and object detection are also employed at each scale. Fig. A1 shows the coarse-to-fine occupancy prediction.

**Visualization.** We provide more visualization results on *val unseen* of R2R [1] and REVERIE [12]. In Fig. A2, our agent recognizes the ‘toilet’ and ‘bathtub’, and then finds the first door easily. We illustrate the 3D layout estimation in Fig. A3. Given the multi-view images as input, our model

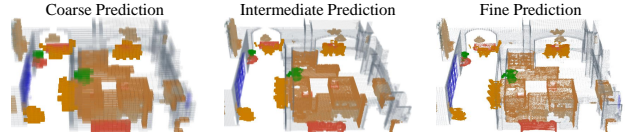

Figure A1. Visualization of multi-resolution occupancy prediction (more details in §3.1).

can capture the 3D geometric information and reconstruct the room structure.

## B. Model Details

### B.1. Environment Encoder

**Cross-view Attention(CVA).** We propose cross-view attention for 2D-3D sampling (§3.1) and use the camera projection function  $\mathcal{P}_c$  to obtain the reference points (Eq. 1), which is formulated as follows:

$$CVA(Q(x, y, z), F^{2d}) = DA(Q(x, y, z), \mathcal{P}_c(\mathbf{p}), F^{2d}), \quad (B1)$$

where  $Q(x, y, z) \in \mathbb{R}^{D_e}$  is located at  $(x, y, z)$  position of  $Q \in \mathbb{R}^{D_e \times X \times Y \times Z}$ ,  $F^{2d} \in \mathbb{R}^{D_i \times H \times W}$  is the image feature, and  $\mathcal{P}_c$  employs the camera intrinsic and extrinsic parameters for transformation. DA is the deformable attention [14]:

$$DA(\mathbf{q}, \mathbf{p}, \mathbf{F}) = \sum_{k=1}^K \mathbf{W}_k \sum_{s=1}^S \mathbf{A}_{ks} \mathbf{W}_s \mathbf{F}(\mathbf{p} + \delta \mathbf{p}_{ks}), \quad (B2)$$

where  $K$  is the number of attention heads,  $s$  indexes a total of  $S$  sampling points,  $\mathbf{W}_s$  is the learning weight,  $\mathbf{A}_{ks} \in [0, 1]$  is the learnable attention weight,  $\delta \mathbf{p}_{ks} \in \mathbb{R}^2$  is the predicted offset to the reference point  $\mathbf{p}$ , and  $\mathbf{F}(\mathbf{p} + \delta \mathbf{p}_{ks})$  is the feature at location  $\mathbf{p} + \delta \mathbf{p}_{ks}$  computed by bilinear interpolation. We sample  $S = 6$  points for each query in CVA.

**Multi-task Learning.** We adopt ViT-B/16 [5] pretrained on ImageNet as the backbone. The size of the image features  $F^{2d}$  are  $1280 \times 1024 \times 768$ . We train the perception network with a detection head, a layout regression head, and a multi-class occupancy prediction head using the AdamW optimizer with a learning rate of  $1 \times 10^{-4}$  for 500 epoches (see §3.1).

\*Corresponding author: Yi Yang.

Make a left out the room with the toilet and walk past the bathtub. Turn at your first doorway on your right. Walk into the closet and stop immediately.

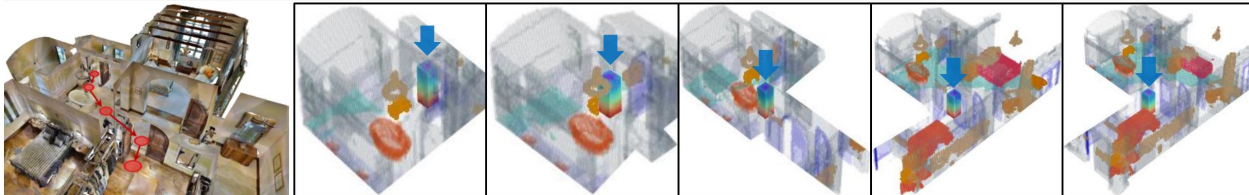

Figure A2. Visual results on *val unseen* of R2R (i,ii) and REVERIE (iii). During navigation, our agent recognizes the surrounding objects, captures the fine-grained details, and then performs comprehensive decision-making to finish the task successfully. Please zoom in for best view (more details in §A).

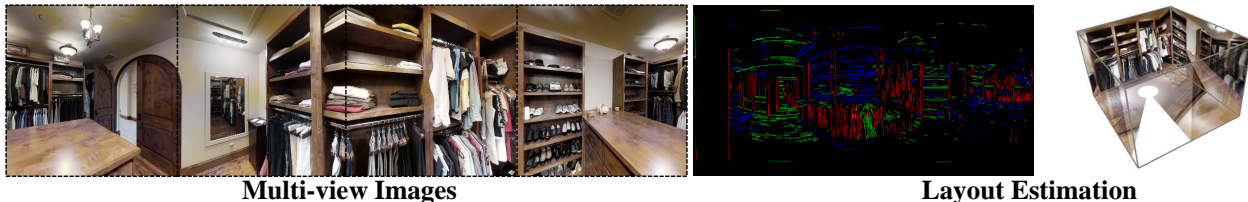

Figure A3. Visualization of 3D room layout. Different from panoramic images in previous studies [15, 16], we adopt multi-view 2D images as input. Please zoom in for best view (more details in §A).

## B.2. Action Prediction

**Object Prediction.** For REVERIE [12], the agent needs to identify the specific objects. We first use the ViT-B/16 pretrained on ImageNet to extract the features of  $N_t^o$  objects at  $t$ -th step  $\mathbf{O}_t = \{\mathbf{o}_n | \mathbf{o}_n \in \mathbb{R}^{D_o}\}_{n=1}^{N_t^o}$ , and add orientation features [3, 4] with heading and elevation angles ( $D_o = 768$ ). Then these object features are concatenated with grouped VERs from different heights  $\{\mathbf{F}_{t,z}^g \in \mathbb{R}^{D_e \times XY}\}_{z=1}^Z$  (§3.2). We apply multi-layer transformers (MLT) to each group as (see Eq. 5):

$$\begin{aligned} \tilde{\mathbf{F}}_{t,z}^g, \tilde{\mathbf{O}}_{t,z} &= \text{MLT}([\mathbf{E}; \mathbf{F}_{t,z}^g; \mathbf{O}_{t,z}]), \\ \tilde{\mathbf{O}}_t &= \sum_{z=1}^Z \tilde{\mathbf{O}}_{t,z} \in \mathbb{R}^{D_o \times N_t^o}. \end{aligned} \quad (\text{B3})$$

Then, the object prediction is formulated as:

$$\mathbf{p}_t^o = \text{Softmax}(\text{MLP}(\tilde{\mathbf{O}}_t)) \in \mathbb{R}^{N_t^o}. \quad (\text{B4})$$

**Pretraining Objectives.** For R2R [1] and R4R [7], we use Masked Language Modeling (MLM) [3, 8] and Single-step Action Prediction (SAP) [3, 6] as auxiliary tasks in the pre-training stage. For REVERIE [12], the Object Grounding (OG) [4, 10] is also used for object reasoning, and the sample ratio is MLM:SAP:OG=1:1:1. These auxiliary tasks are based on the input pair  $(\mathbf{E}, \mathbf{F}_t^{3d}, \mathbf{G}_t)$ , where  $\mathbf{E} \in \mathbb{R}^{D_w \times L}$  are the word embeddings,  $\mathbf{F}_t^{3d} \in \mathbb{R}^{D_e \times X \times Y \times Z}$  is the encoded VER, and  $\mathbf{G}_t \in \mathbb{R}^{D_e \times |\mathcal{V}_t|}$  are the node embeddings of the *episodic memory*  $\mathcal{G}_t$  at time step  $t$  (see §3).

**Finetuning Objectives.** During finetuning, we alternatively use teacher-forcing and student-forcing for action prediction [3, 6]. For REVERIE, OG is also adopted for finetuning:

$$\mathcal{L}_{action} = 0.25\mathcal{L}_{tf} + \mathcal{L}_{sf} + \mathcal{L}_{OG}. \quad (\text{B5})$$

## C. Discussion

**Terms of use, Privacy, and License.** Matterport3D [2], R2R [1], and REVERIE [12] are available for non-commercial research purpose. Our code is implemented on the MMDetection3D codebase. MMDetection3D (<https://github.com/open-mmlab/mmdetection3d>) is released under Apache 2.0 license.

**Limitation.** As our agent is trained and evaluated on Matterport3D Simulator, where all environments are not dynamic, deploying the algorithm directly on a real-world robot may face challenges in capturing moving objects. Therefore, additional research and development are required to ensure safe deployment in real-world scenarios. This involves incorporating flow annotations and predicting voxel velocity for foreground objects. Our work primarily addresses the interior Vision-Language Navigation task. The generalization of this approach to other navigation tasks [9, 11, 13] is not clear, and we plan to explore this in future work.

**Broader Impact.** We propose a powerful environment representation VER for VLN. Equipped with VER, our agent is able to perform comprehensive decision-making. On VLN benchmarks, our model demonstrates a promising improvement. In addition, we encourage more technical researching efforts devoted to environment representation learning for future research in the community.

## References

- [1] Peter Anderson, Qi Wu, Damien Teney, Jake Bruce, Mark Johnson, Niko Sünderhauf, Ian D. Reid, Stephen Gould, and Anton van den Hengel. Vision-and-language navigation: Interpreting visually-grounded navigation instructions in real environments. In *CVPR*, 2018. 1, 2

- [2] Angel Chang, Angela Dai, Thomas Funkhouser, Maciej Halber, Matthias Niebner, Manolis Savva, Shuran Song, Andy Zeng, and Yinda Zhang. Matterport3d: Learning from rgb-d data in indoor environments. In *3DV*, 2017. 2
- [3] Shizhe Chen, Pierre-Louis Guhur, Cordelia Schmid, and Ivan Laptev. History aware multimodal transformer for vision-and-language navigation. In *NIPS*, 2021. 2
- [4] Shizhe Chen, Pierre-Louis Guhur, Makarand Tapaswi, Cordelia Schmid, and Ivan Laptev. Think global, act local: Dual-scale graph transformer for vision-and-language navigation. In *CVPR*, 2022. 2
- [5] Alexey Dosovitskiy, Lucas Beyer, Alexander Kolesnikov, Dirk Weissenborn, Xiaohua Zhai, Thomas Unterthiner, Mostafa Dehghani, Matthias Minderer, Georg Heigold, Sylvain Gelly, et al. An image is worth 16x16 words: Transformers for image recognition at scale. In *ICLR*, 2020. 1
- [6] Yicong Hong, Qi Wu, Yuankai Qi, Cristian Rodriguez-Opazo, and Stephen Gould. Vln bert: A recurrent vision-and-language bert for navigation. In *CVPR*, 2021. 2
- [7] Vihan Jain, Gabriel Magalhaes, Alexander Ku, Ashish Vaswani, Eugene Ie, and Jason Baldridge. Stay on the path: Instruction fidelity in vision-and-language navigation. In *ACL*, 2019. 2
- [8] Jacob Devlin Ming-Wei Chang Kenton and Lee Kristina Toutanova. Bert: Pre-training of deep bidirectional transformers for language understanding. In *NAACL*, 2019. 2
- [9] Jacob Krantz, Erik Wijmans, Arjun Majumdar, Dhruv Batra, and Stefan Lee. Beyond the nav-graph: Vision-and-language navigation in continuous environments. In *ECCV*, 2020. 2
- [10] Xiangru Lin, Guanbin Li, and Yizhou Yu. Scene-intuitive agent for remote embodied visual grounding. In *CVPR*, 2021. 2
- [11] Shubo Liu, Hongsheng Zhang, Yuankai Qi, Peng Wang, Yanning Zhang, and Qi Wu. Aerialvln: Vision-and-language navigation for uavs. In *ICCV*, 2023. 2
- [12] Yuankai Qi, Qi Wu, Peter Anderson, Xin Wang, William Yang Wang, Chunhua Shen, and Anton van den Hengel. Reverie: Remote embodied visual referring expression in real indoor environments. In *CVPR*, 2020. 1, 2
- [13] Karmesh Yadav, Jacob Krantz, Ram Ramrakhya, Santhosh Kumar Ramakrishnan, Jimmy Yang, Austin Wang, John Turner, Aaron Gokaslan, Vincent-Pierre Berges, Roozbeh Mootaghi, Oleksandr Maksymets, Angel X Chang, Manolis Savva, Alexander Clegg, Devendra Singh Chaplot, and Dhruv Batra. Habitat challenge 2023. <https://aihabitat.org/challenge/2023/>, 2023. 2
- [14] Xizhou Zhu, Weijie Su, Lewei Lu, Bin Li, Xiaogang Wang, and Jifeng Dai. Deformable detr: Deformable transformers for end-to-end object detection. In *ICLR*, 2020. 1
- [15] Chuhan Zou, Alex Colburn, Qi Shan, and Derek Hoiem. Layoutnet: Reconstructing the 3d room layout from a single rgb image. In *CVPR*, 2018. 2
- [16] Chuhan Zou, Jheng-Wei Su, Chi-Han Peng, Alex Colburn, Qi Shan, Peter Wonka, Hung-Kuo Chu, and Derek Hoiem. Manhattan room layout reconstruction from a single 360 image: A comparative study of state-of-the-art methods. *IJCV*, 129:1410–1431, 2021. 2
